# Competing Demands for Time and Self-Care Behaviors, Processes of Care, and Intermediate Outcomes Among People With Diabetes

## Translating Research Into Action for Diabetes (TRIAD)

LAURA N. McEWEN, PHD<sup>1</sup>  
 CATHERINE KIM, MD, MPH<sup>1,2</sup>  
 SUSAN L. ETTNER, PHD<sup>3,4</sup>  
 WILLIAM H. HERMAN, MD, MPH<sup>1,5</sup>

ANDREW J. KARTER, PHD<sup>6</sup>  
 GLORIA L. BECKLES, MD, MSC<sup>7</sup>  
 ARLEEN F. BROWN, MD, PHD<sup>3</sup>

self-care behaviors, processes of care, and intermediate health outcomes.

### RESEARCH DESIGN AND METHODS

**OBJECTIVE**—To determine whether competing demands for time affect diabetes self-care behaviors, processes of care, and intermediate outcomes.

**RESEARCH DESIGN AND METHODS**—We used survey and medical record data from 5,478 participants in Translating Research Into Action for Diabetes (TRIAD) and hierarchical regression models to examine the cross-sectional associations between competing demands for time and diabetes outcomes, including self-management, processes of care, and intermediate health outcomes.

**RESULTS**—Fifty-two percent of participants reported no competing demands, 7% reported caregiving responsibilities only, 36% reported employment responsibilities only, and 6% reported both caregiving and employment responsibilities. For both women and men, employment responsibilities (with or without caregiving responsibilities) were associated with lower rates of diabetes self-care behaviors, worse processes of care, and, in men, worse HbA<sub>1c</sub>.

**CONCLUSIONS**—Accommodations for competing demands for time may promote self-management and improve the processes and outcomes of care for employed adults with diabetes.

*Diabetes Care* 34:1180–1182, 2011

Diabetes self-management entails a complex set of health behaviors. For people living with young children or dependent adults and for those who work outside the home, caregiving responsibilities and/or expectations in the workplace may be barriers to self-management (1).

We conducted a cross-sectional analysis using data from Translating Research Into Action for Diabetes (TRIAD), a multicenter prospective observational study of diabetes care in managed care, to assess whether there are associations between competing demands for time and diabetes

### Study population

TRIAD has been described in detail elsewhere (2). In 2000–2001 and 2002–2003, surveys were administered by computer-assisted telephone interview or in writing by mail. Medical records were reviewed by centrally trained reviewers. We included participants who had survey and medical record data at both baseline and follow-up ( $N = 5,478$ ). Characteristics of the study population were similar to those of the entire TRIAD population ( $N = 11,927$ ) (Supplementary Data).

### Outcomes

Outcomes included three dichotomized self-management measures (physical activity, daily foot care, and daily self-monitoring of blood glucose), seven dichotomized processes of care (aspirin advise or use, eye exam, foot exam, HbA<sub>1c</sub>, influenza immunization, cholesterol, and proteinuria testing), and three intermediate outcomes (HbA<sub>1c</sub>, systolic blood pressure, and LDL-cholesterol). We also assessed the unweighted sum of the seven dichotomized processes of care as a continuous variable (range of scores 0–7) (3).

### Independent variables

Patients were classified into four mutually exclusive groups: caregiving responsibilities only, employment responsibilities only, both, and neither. Indicators for each of the first three groups were included in multivariable regression models with “neither” as the reference group. Respondents were considered to have caregiving responsibilities if they were primarily responsible for a child <7 years of age or a household member who required special care and to have employment responsibilities if they worked  $\geq 32$  h per week (4) or

From the <sup>1</sup>Department of Internal Medicine, University of Michigan, Ann Arbor, Michigan; the <sup>2</sup>Department of Obstetrics and Gynecology, University of Michigan, Ann Arbor, Michigan; the <sup>3</sup>Division of General Internal Medicine and Health Services Research, Department of Medicine, University of California, Los Angeles, California; the <sup>4</sup>Department of Health Services, University of California, Los Angeles, California; the <sup>5</sup>Department of Epidemiology, University of Michigan, Ann Arbor, Michigan; the <sup>6</sup>Division of Research, Kaiser Permanente, Oakland, California; and the <sup>7</sup>Division of Diabetes Translation, Centers for Disease Control and Prevention, Atlanta, Georgia.

Corresponding author: Laura N. McEwen, lmattei@med.umich.edu.

Received 27 October 2010 and accepted 25 February 2011.

DOI: 10.2337/dc10-2038

This article contains Supplementary Data online at <http://care.diabetesjournals.org/lookup/suppl/doi:10.2337/dc10-2038/-DC1>.

The contents of this article are solely the responsibility of the authors and do not represent the official positions of the Centers for Disease Control and Prevention, nor do they represent the views of the funding agency(s).

© 2011 by the American Diabetes Association. Readers may use this article as long as the work is properly cited, the use is educational and not for profit, and the work is not altered. See <http://creativecommons.org/licenses/by-nc-nd/3.0/> for details.

≥16 but <32 h but made decisions in the workplace or supervised others.

Analyses were adjusted for age, race/ethnicity, education, income, duration of diabetes, diabetes treatment, health status, spouse employment, and spouse education.

### Statistical analysis

We multiply imputed missing values for dependent and independent variables (IVEware, Ann Arbor, MI). Five imputed datasets were used to estimate multivariable regression models while accounting for clustering of patients at the health plan/

provider group level. We constructed linear regression models for continuous outcomes and logistic models for dichotomous outcomes and calculated predicted probabilities with 95% CIs (Table 1). Adjusted models were run separately for men and women.

**Table 1—Multivariate linear and logistic regression models stratified by sex (N = 5,478)**

|                                                               | Competing demands/independent variables*                       |                   |                                  |                                                 |
|---------------------------------------------------------------|----------------------------------------------------------------|-------------------|----------------------------------|-------------------------------------------------|
|                                                               | Neither caregiving nor employment responsibilities (Reference) | Caregiving only   | Employment responsibilities only | Both caregiving and employment responsibilities |
| <b>Women (N = 2,874)</b>                                      |                                                                |                   |                                  |                                                 |
| Self-care behaviors                                           |                                                                |                   |                                  |                                                 |
| Physical activity (vigorous vs. none/little)                  | 0.43 (0.41–0.45)                                               | 0.48 (0.42–0.54)  | 0.44 (0.40–0.48)                 | 0.47 (0.37–0.57)                                |
| Foot self-care performed                                      | 0.65 (0.63–0.67)                                               | 0.63 (0.57–0.69)  | 0.61 (0.57–0.65)                 | 0.60 (0.50–0.70)                                |
| Self-monitoring blood glucose (does not adjust for treatment) |                                                                |                   |                                  |                                                 |
| Oral medication only                                          | 0.47 (0.45–0.49)                                               | 0.50 (0.42–0.58)  | 0.43 (0.37–0.49)                 | 0.46 (0.34–0.58)                                |
| Insulin users                                                 | 0.72 (0.70–0.74)                                               | 0.75 (0.63–0.87)  | 0.65 (0.57–0.73)                 | 0.57 (0.41–0.73)†                               |
| Processes of care                                             |                                                                |                   |                                  |                                                 |
| Aspirin advised/taking                                        | 0.63 (0.61–0.65)                                               | 0.63 (0.57–0.69)  | 0.59 (0.55–0.69)†                | 0.53 (0.45–0.61)†                               |
| Dilated eye exam performed                                    | 0.80 (0.78–0.82)                                               | 0.78 (0.72–0.84)  | 0.79 (0.75–0.83)                 | 0.75 (0.67–0.83)                                |
| Foot exam performed                                           | 0.85 (0.83–0.87)                                               | 0.87 (0.81–0.93)  | 0.84 (0.80–0.88)                 | 0.83 (0.77–0.89)                                |
| Glycemic control assessed                                     | 0.86 (0.84–0.88)                                               | 0.85 (0.79–0.91)  | 0.82 (0.78–0.86)†                | 0.84 (0.76–0.92)                                |
| Influenza immunization                                        | 0.72 (0.70–0.74)                                               | 0.70 (0.64–0.76)  | 0.66 (0.62–0.70)†                | 0.65 (0.57–0.73)                                |
| LDL assessed                                                  | 0.74 (0.72–0.76)                                               | 0.70 (0.64–0.76)  | 0.71 (0.67–0.75)                 | 0.70 (0.62–0.78)                                |
| Proteinuria assessed                                          | 0.82 (0.80–0.84)                                               | 0.78 (0.72–0.84)  | 0.82 (0.78–0.86)                 | 0.78 (0.70–0.86)                                |
| Unweighted sum of seven processes of care                     | 5.41 (5.35–5.47)                                               | 5.32 (5.12–5.52)  | 5.24 (5.12–5.36)†                | 5.10 (4.85–5.35)†                               |
| Intermediate outcomes                                         |                                                                |                   |                                  |                                                 |
| HbA <sub>1c</sub>                                             | 7.86 (7.80–7.92)                                               | 8.17 (7.92–8.42)† | 7.96 (7.82–8.10)                 | 8.16 (7.85–8.47)                                |
| Systolic blood pressure                                       | 136 (135–137)                                                  | 136 (133–139)     | 136 (134–138)                    | 137 (134–140)                                   |
| LDL                                                           | 112 (111–113)                                                  | 112 (107–117)     | 114 (111–117)                    | 113 (107–119)                                   |
| <b>Men (N = 2,604)</b>                                        |                                                                |                   |                                  |                                                 |
| Self-care behaviors                                           |                                                                |                   |                                  |                                                 |
| Physical activity (vigorous vs. none/little)                  | 0.49 (0.47–0.51)                                               | 0.54 (0.44–0.64)  | 0.47 (0.43–0.51)                 | 0.47 (0.37–0.57)                                |
| Foot self-care performed                                      | 0.58 (0.56–0.60)                                               | 0.61 (0.49–0.73)  | 0.53 (0.49–0.57)†                | 0.50 (0.40–0.60)                                |
| Self-monitoring blood glucose (does not adjust for treatment) |                                                                |                   |                                  |                                                 |
| Oral medication only                                          | 0.38 (0.36–0.40)                                               | 0.39 (0.27–0.51)  | 0.33 (0.29–0.37)†                | 0.31 (0.21–0.41)                                |
| Insulin users                                                 | 0.69 (0.65–0.73)                                               | 0.73 (0.59–0.87)  | 0.67 (0.59–0.75)                 | 0.68 (0.52–0.84)                                |
| Processes of care                                             |                                                                |                   |                                  |                                                 |
| Aspirin advised/taking                                        | 0.67 (0.62–0.78)                                               | 0.70 (0.62–0.78)  | 0.65 (0.61–0.69)                 | 0.60 (0.50–0.70)                                |
| Dilated eye exam performed                                    | 0.77 (0.75–0.79)                                               | 0.73 (0.63–0.83)  | 0.75 (0.71–0.79)                 | 0.73 (0.65–0.81)                                |
| Foot exam performed                                           | 0.85 (0.83–0.87)                                               | 0.83 (0.75–0.91)  | 0.83 (0.79–0.87)                 | 0.85 (0.77–0.93)                                |
| Glycemic control assessed                                     | 0.86 (0.84–0.88)                                               | 0.86 (0.80–0.92)  | 0.85 (0.81–0.89)                 | 0.82 (0.74–0.90)                                |
| Influenza immunization                                        | 0.71 (0.69–0.73)                                               | 0.65 (0.57–0.73)  | 0.65 (0.61–0.69)†                | 0.59 (0.5–0.67)†                                |
| LDL assessed                                                  | 0.76 (0.74–0.78)                                               | 0.77 (0.69–0.85)  | 0.74 (0.70–0.78)                 | 0.70 (0.60–0.80)                                |
| Proteinuria assessed                                          | 0.82 (0.80–0.84)                                               | 0.82 (0.74–0.90)  | 0.80 (0.76–0.84)                 | 0.79 (0.71–0.87)                                |
| Unweighted sum of seven processes of care                     | 5.44 (5.38–5.50)                                               | 5.37 (5.10–5.64)  | 5.27 (5.15–5.39)†                | 5.09 (4.82–5.36)†                               |
| Intermediate outcomes                                         |                                                                |                   |                                  |                                                 |
| HbA <sub>1c</sub>                                             | 7.81 (7.73–7.89)                                               | 8.16 (7.85–8.47)† | 7.98 (7.84–8.12)†                | 8.32 (7.97–8.67)†                               |
| Systolic blood pressure                                       | 134 (133–135)                                                  | 133 (130–136)     | 133 (131–135)                    | 132 (128–136)                                   |
| LDL                                                           | 106 (105–107)                                                  | 104 (97–111)      | 108 (105–110)                    | 110 (104–116)                                   |

Predicted probabilities and 95% CIs are shown. \*Adjusted for age, race/ethnicity, education, income, time since diabetes diagnosis, diabetes treatment, health status, spouse employment, spouse education, and provider group. †P value < 0.05.

Analyses were performed using SAS (version 9.1.3 SP 4; Cary, NC) and SUDAAN (version 10.0; Research Triangle Park, NC).

**RESULTS**—Patient characteristics are shown in Supplementary Data 2. When compared with patients who had neither caregiving nor employment responsibilities, those with employment responsibilities (with or without caregiving) had lower levels of self-care and poorer processes of care.

Among women, employment responsibilities were associated with lower rates of aspirin being advised or taken (59 vs. 63%;  $P = 0.018$ ), glycemic control being assessed (82 vs. 86%;  $P = 0.005$ ), influenza immunization (66 vs. 72%;  $P = 0.001$ ), and fewer processes of care (5.2 vs. 5.4 processes;  $P = 0.002$ ). Both employment responsibilities and caregiving in women were associated with less self-monitoring of blood glucose among insulin users (57 vs. 72%;  $P = 0.031$ ), lower rates of aspirin use (53 vs. 63%;  $P = 0.013$ ), and fewer processes of care (5.1 vs. 5.4;  $P = 0.012$ ). In women, caregiving only was associated with a higher mean HbA<sub>1c</sub> (8.2 vs. 7.9%;  $P = 0.020$ ).

Among men, employment responsibilities were associated with lower rates of foot care (53 vs. 58%;  $P = 0.003$ ), less self-monitoring of blood glucose for oral medication users (33 vs. 38%;  $P = 0.020$ ), lower rates of influenza immunization (65 vs. 71%;  $P = 0.0002$ ), and fewer processes of care (5.3 vs. 5.4;  $P = 0.001$ ). Both employment responsibilities and caregiving were associated with lower rates of influenza immunization (59 vs. 71%;  $P = 0.003$ ) and fewer processes of care (5.1 vs. 5.4;  $P = 0.017$ ). In men, mean HbA<sub>1c</sub> was lowest in the reference group (neither caregiving nor employment responsibilities, 7.8%) and higher in the three comparison groups (caregiving only, 8.2%,  $P = 0.028$ ; employment only, 8.0%,  $P = 0.008$ ; and both caregiving and employment, 8.3%,  $P = 0.003$ ).

**CONCLUSIONS**—In both women and men with diabetes, employment, with or without caregiving responsibilities, was associated with lower levels of diabetes self-management, poorer processes of care, and, in men, worse HbA<sub>1c</sub>. Previous studies have found no association between caregiving responsibilities and preventive health care (5–7). We found a consistent trend between competing demands and intermediate outcomes, namely, higher HbA<sub>1c</sub> levels, in both men and women.

Caregiving responsibilities fall disproportionately on women (8,9), especially African American women (1,10,11), and the elderly who care for their spouses (7,12). Higher-income patients may purchase formal assistance (either for caregiving or other household responsibilities), thereby attenuating any potential association between caregiving responsibilities and receipt of preventive health measures.

We found strong and consistent relationships between employment responsibilities and fewer processes of care. Previous studies have shown higher attrition rates in diabetes self-management education classes for the employed compared with the unemployed or retired (13,14). Employment demands may be qualitatively different from caregiving demands, and less accommodating to the requirements of diabetes care.

Limitations of our study are that all participants were enrolled in managed care health plans. Results may be different for people without insurance. We did not assess formal or informal support. Such support may reduce any associations between competing demands for time and diabetes care and have biased our results to the null. We measured only two aspects of employment responsibilities: time and decision making/supervision. We did not assess work flexibility. Finally, there is the possibility of spurious significant results as a result of multiple comparisons.

Future studies should focus on broader population groups, examine formal or informal support, and determine whether expanded access to medical care for employed people improves processes or outcomes.

**Acknowledgments**—This study was jointly funded by Program Announcement Number 04005 from the Centers for Disease Control and Prevention (Division of Diabetes Translation) and the National Institute of Diabetes and Digestive and Kidney Diseases. Significant contributions to this study were made by members of the TRIAD Study Group.

No potential conflicts of interest relevant to this article were reported.

L.N.M. researched data and wrote the manuscript. C.K., S.L.E., and W.H.H. reviewed and edited the manuscript and contributed to discussion. A.J.K. and G.L.B. reviewed and edited the manuscript. A.F.B. reviewed and edited the manuscript and contributed to discussion.

The authors thank Robert Gerzoff, Centers for Disease Control and Prevention, for his assistance with the statistical aspects of this article and acknowledge the participation of their health plan partners.

## References

- Samuel-Hodge CD, Headen SW, Skelly AH, et al. Influences on day-to-day self-management of type 2 diabetes among African-American women: spirituality, the multi-caregiver role, and other social context factors. *Diabetes Care* 2000;23:928–933
- TRIAD Study Group. The Translating Research Into Action for Diabetes (TRIAD) study: a multicenter study of diabetes in managed care. *Diabetes Care* 2002;25:386–389
- Kim C, McEwen LN, Gerzoff RB, et al. Is physician gender associated with the quality of diabetes care? *Diabetes Care* 2005;28:1594–1598
- U.S. Office of Personnel Management. Chapter 24. Change in work schedule/change in hours [Internet]. Available from <http://www.opm.gov/feddata/gppa/gppa24.pdf>. Accessed 25 August 2010
- Kim C, Kabeto MU, Wallace RB, Langa KM. Quality of preventive clinical services among caregivers in the health and retirement study. *J Gen Intern Med* 2004;19:875–878
- Scharlach AE, Midanik LT, Runkle MC, Soghikian K. Health practices of adults with elder care responsibilities. *Prev Med* 1997;26:155–161
- Burton LC, Newsom JT, Schulz R, Hirsch CH, German PS. Preventive health behaviors among spousal caregivers. *Prev Med* 1997;26:162–169
- Katz SJ, Kabeto M, Langa KM. Gender disparities in the receipt of home care for elderly people with disability in the United States. *JAMA* 2000;284:3022–3027
- Lee S, Colditz GA, Berkman LF, Kawachi I. Caregiving and risk of coronary heart disease in U.S. women: a prospective study. *Am J Prev Med* 2003;24:113–119
- Cagle CS, Appel S, Skelly AH, Carter-Edwards L. Mid-life African-American women with type 2 diabetes: influence on work and the multicaregiver role. *Ethn Dis* 2002;12:555–566
- Samuel-Hodge CD, Skelly AH, Headen S, Carter-Edwards L. Familial roles of older African-American women with type 2 diabetes: testing of a new multiple caregiving measure. *Ethn Dis* 2005;15:436–443
- Schulz R, Beach SR. Caregiving as a risk factor for mortality: the Caregiver Health Effects Study. *JAMA* 1999;282:2215–2219
- Gucciardi E, DeMelo M, Booth G, Tomlinson G, Stewart DE. Individual and contextual factors associated with follow-up use of diabetes self-management education programmes: a multisite prospective analysis. *Diabet Med* 2009;26:510–517
- Gucciardi E, DeMelo M, Offenheim A, Grace SL, Stewart DE. Patient factors associated with attrition from a self-management education programme. *J Eval Clin Pract* 2007;13:913–919
